# Supplementary material for: Genome-wide identification and expression profiling analysis of maize AP2/ERF superfamily genes reveal essential roles in abiotic stress tolerance
Source: PubMed Central journal article supplement (PMC8841118; doi:10.1186/s12864-022-08345-7), 2022-02-12

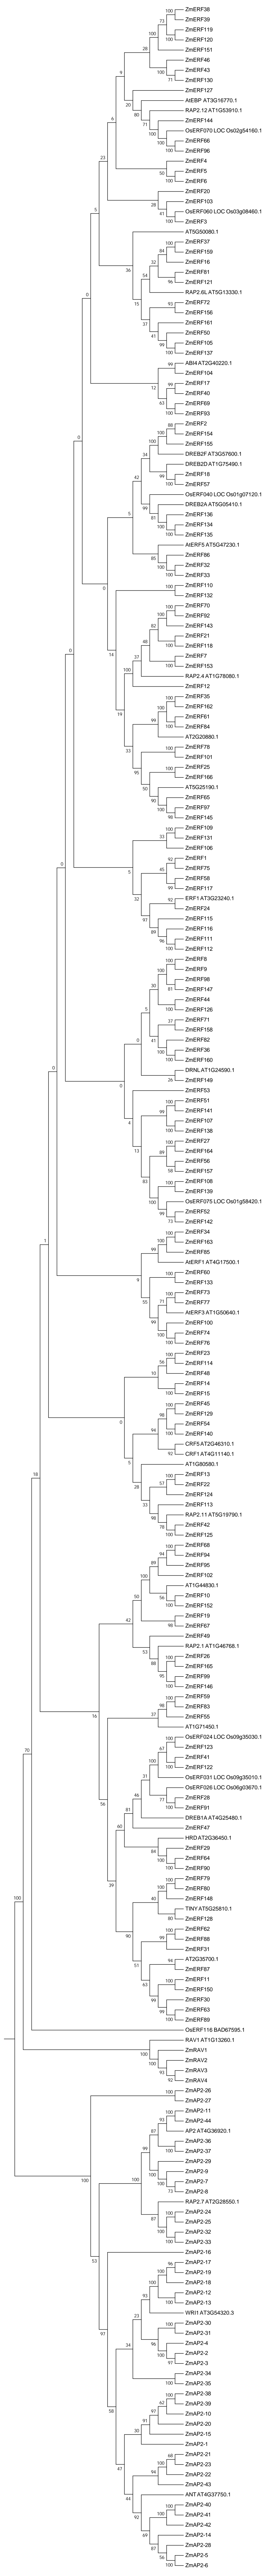

Supplement: 12864_2022_8345_MOESM1_ESM.pdf [file 12864_2022_8345_MOESM1_ESM.pdf]
